# Supplementary material for: Mouse Lymphoblastic Leukemias Induced by Aberrant Prdm14 Expression Demonstrate Widespread Copy Number Alterations Also Found in Human ALL
Source: PubMed Central journal article supplement (PMC3593237; doi:10.3390/cancers4041050), 2012-10-18

**Supplementary Figure 1.** Global genome view histogram of chromosome X (left) and Y (right), depicting regions of amplification and deletion. X-axis depicts frequency of amplifications greater than 2.3 copies (red) or deletions less than 1.7 copies (blue). Variance in Y chromosome (some samples with more, some with less Y chromosome) reflects mixed gender of donor cells in control tissue.

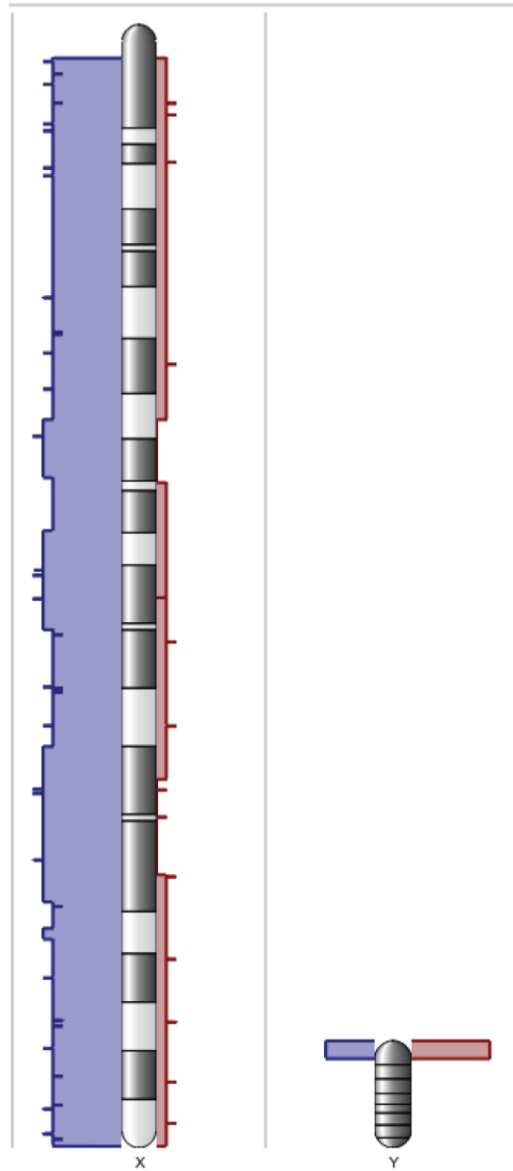

Supplement: NIHMS442664-supplement-Sup_Figure_1.pdf [file NIHMS442664-supplement-Sup_Figure_1.pdf]
