# Supplementary material for: Mouse Lymphoblastic Leukemias Induced by Aberrant Prdm14 Expression Demonstrate Widespread Copy Number Alterations Also Found in Human ALL
Source: PubMed Central journal article supplement (PMC3593237; doi:10.3390/cancers4041050), 2012-10-18
Supplement: NIHMS442664-supplement-Sup_Table_3.pdf [file NIHMS442664-supplement-Sup_Table_3.pdf]

**Supplementary Table 3.** Fold change in expression of genes involved in DNA repair or meiotic recombination. Illumina MG6 Chips were used to assess expression in MIGR1-Prdm14-induced pre-leukemic cells versus empty vector pre-leukemic cells [12]. Changes in those genes involved in DNA repair or meiosis are shown.

| <b>Gene symbol</b> | <b>Fold change</b> | <b>Adjusted P value corrected for multiple testing</b> | <b>Alternate gene symbol</b> | <b>Role</b> |
|--------------------|--------------------|--------------------------------------------------------|------------------------------|-------------|
| <i>Rsph1</i>       | 3.6191881          | 0.00270947                                             | <i>Tsga2</i>                 | Meiosis     |
| <i>Spo11</i>       | 2.260731973        | 0.00279317                                             |                              | Meiosis     |
| <i>Cep164</i>      | 1.996555387        | 0.000529528                                            | <i>D030051D21</i>            | DNA Repair  |
| <i>Zfp318</i>      | 1.7090723          | 0.017328638                                            |                              | Meiosis     |
| <i>Msh5</i>        | 1.3772303          | 0.048407612                                            |                              | Meiosis     |
| <i>Mgmt</i>        | 1.362312072        | 0.031249771                                            |                              | DNA Repair  |
| <i>Ercc5</i>       | 1.362075071        | 0.027032501                                            |                              | DNA Repair  |
| <i>Poll</i>        | 1.3441006          | 0.025402621                                            |                              | DNA Repair  |
| <i>Clgn</i>        | 1.324112028        | 0.004936568                                            |                              | Meiosis     |
| <i>Mbd4</i>        | 1.3031165          | 0.037776596                                            |                              | DNA Repair  |
| <i>Chaf1b</i>      | 1.2656371          | 0.003541039                                            |                              | DNA Repair  |
| <i>Setx</i>        | 1.219389           | 0.038398723                                            | <i>AW060766</i>              | DNA Repair  |
| <i>Ube2a</i>       | 1.167635347        | 0.034720342                                            |                              | DNA Repair  |
| <i>Ube2b</i>       | 1.149527262        | 0.04546337                                             |                              | Meiosis     |
| <i>Rtel1</i>       | -1.114172445       | 0.049838753                                            | <i>AW540478</i>              | DNA Repair  |
| <i>Ercc3</i>       | -1.199593813       | 0.043022755                                            |                              | DNA Repair  |
| <i>Brip1</i>       | -1.22568508        | 0.006826531                                            |                              | DNA Repair  |
| <i>Cinp</i>        | -1.243907244       | 0.024792337                                            | <i>2810452K22Rik</i>         | DNA Repair  |
| <i>Lig3</i>        | -1.249874087       | 0.046508525                                            |                              | DNA Repair  |
| <i>Blm</i>         | -1.25666748        | 0.005006649                                            |                              | DNA Repair  |
| <i>Fancd2</i>      | -1.256685205       | 0.027651204                                            |                              | DNA Repair  |
| <i>Rad23b</i>      | -1.271030696       | 0.034107433                                            |                              | DNA Repair  |
| <i>Ddb1</i>        | -1.27729361        | 0.039432097                                            |                              | DNA Repair  |
| <i>Apbb1</i>       | -1.295836127       | 0.007800335                                            |                              | DNA Repair  |
| <i>Usp1</i>        | -1.379884985       | 0.046051803                                            |                              | DNA Repair  |
| <i>Uhrf1</i>       | -1.412413922       | 0.009732253                                            |                              | DNA Repair  |
| <i>Slk</i>         | -1.949725994       | 0.000748194                                            |                              | DNA Repair  |
| <i>Xrcc6</i>       | -3.275334807       | 0.002152631                                            | <i>G22p1</i>                 | DNA Repair  |
